# Supplementary material for: Patients´ experiences in a newly established clinic for late complications after colorectal and anal cancer treatment: a qualitative study
Source: Research Square preprint supplement (doi:10.21203/rs.3.rs-1144967/v1), 2022-01-14
Supplement: Supplementary file 1 [file e46df16a41a5822c821e44e9.docx]

# Checklist of

# Consolidated criteria for reporting qualitative research (COREQ)

| **Domain 1: research team and reflexivity personal characteristics** | |
| --- | --- |
| 1. Interviewer/facilitator Which author/s conducted the interview or focus group? | MSH and TT |
| 2. Credentials What were the researcher’s credentials? | *MSH: nurse, TT: Nurse and professor* |
| 3. Occupation What was their occupation at the time of the study? | *MSH* *nurse with responsibility for research and development in the department of surgery*  *TT professor in the department of anaesthesiology* |
| 4. Gender Was the researcher male or female? | *Female* |
| 5. Experience and training What experience or training did the researcher have? Relationship with participants | *TT had former experience with interviews. Both trained with the interview guide and MSH listened to TT doing the first interview. TT and MSH had no relations to patients in the clinic* |
| 6. Relationship established Was a relationship established prior to study commencement? | *The participants only met the interviewer the day for interview.* |
| 7. Participant knowledge of the interviewer What did the participants know about the researcher? e.g. personal goals, reasons for doing the research: | *The participants were presented in every interview for the interviewer and their relationship to the clinic.* |
| 8. Interviewer characteristics What characteristics were reported about the interviewer/facilitator? e.g. Bias, assumptions, reasons and interests in the research topic | *both interviewers are researcher, both have great interest in the topics of patients pint of view* |
| **Domain 2: study design theoretical framework** | |
| 9. Methodological orientation and Theory What methodological orientation was stated to underpin the study? e.g. grounded theory, discourse analysis, ethnography, phenomenology, content analysis Participant selection | *Content analysis* |
| 10. Sampling How were participants selected? e.g. purposive, convenience, consecutive, snowball | *Sampling were based on selective and purposeful sampling* |
| 11. Method of approach How were participants approached? e.g. face-to-face, telephone, mail, email | *Telephone interview* |
| 12. Sample size How many participants were in the study? | *14* |
| 13. Non-participation How many people refused to participate or dropped out? Reasons? Setting | *1 patient due to he was busy at work and didn´t find the time for the interview* |
| 14. Setting of data collection Where was the data collected? e.g. home, clinic, workplace | *participant were at home.* |
| 15. Presence of non-participants Was anyone else present besides the participants and researchers? | *Telephone interview with a recorder* |
| 16. Description of sample What are the important characteristics of the sample? e.g. demographic data, date Data collection: | *age over and under 60 years, gender, late complication problem stool and others* |
| 17. Interview guide Were questions, prompts, guides provided by the authors? Was it pilot tested? | *We made an interview guide, is was accepted from researchers, interviewers, daily health care professionals. The interview guide were tested in 3 persons before interviewing participants* |
| 18. Repeat interviews Were repeat interviews carried out? If yes, how many? | *No* |
| 19. Audio/visual recording Did the research use audio or visual recording to collect the data? | *Only audio recording* |
| 20. Field notes Were field notes made during and/or after the interview or focus group? | *No* |
| 21. Duration What was the duration of the interviews or focus group? | *median duration of 30 minutes (range 18­­­­-49 minutes)* |
| 22. Data saturation Was data saturation discussed? | *Data saturation were discussed twice before agreement of saturation* |
| 23. Transcripts returned Were transcripts returned to participants for comment and/or correction? | *no* |
| **Domain 3: analysis and findings** | |
| 24. Number of data coders How many data coders coded the data? | *2* |
| 25. Description of the coding tree Did authors provide a description of the coding tree? | *Yes* |
| 26. Derivation of themes Were themes identified in advance or derived from the data? | *Both we had prefixed questions and after coding we deducted new sub-themes* |
| 27. Software What software, if applicable, was used to manage the data? | *Word* |
| 28. Participant checking Did participants provide feedback on the findings? Reporting: | *No* |
| 29. Quotations presented. Were participant quotations presented to illustrate the themes / findings? Was each quotation identified? e.g. participant number | *Each participant had a number. Three quotations are presented* |
| 30. Data and findings consistent Was there consistency between the data presented and the findings? | *Yes* |
| 31. Clarity of major themes Were major themes clearly presented in the findings? | *Yes in figure 1* |
| 32. Clarity of minor themes Is there a description of diverse cases or discussion of minor themes? | *Yes in figure 1* |
